# Supplementary material
Source: publisher figshare collection journal article supplement (https://acs.figshare.com/ndownloader/files/9778813)

# Unravelling the Formation Mechanism of Dendritic Fibrous Nanosilica

Ayan Maity<sup>a</sup>, Avik Das<sup>b</sup>, Debasis Sen<sup>b</sup>, S. Mazumder<sup>b</sup>, Vivek Polshettiwar<sup>a\*</sup>

<sup>a</sup>Department of Chemical Sciences, Tata Institute of Fundamental Research (TIFR), Mumbai 400005, India.

<sup>b</sup>Solid State Physics Division, Bhabha Atomic Research Centre (BARC), Trombay, Mumbai 400085, India

## Contents:

**Fig. S1.** Structural-similarity between CTAB (having C16 carbon chain) and alcohols carbon chain

**Fig. S2.** Bulk emulsion stability using 1-octanol and n-octane as co-surfactant.

**Fig. S3.** Confocal images of emulsion using various alcohol as co-surfactant and Nile red dye as contrast agent, using 543nm continuous-wave laser.

**Fig. S4.** Excess solvent addition test to know the dispersion phase of the emulsion.

**Fig. S5.** Additional SEM images of DFNS formed using various alcohols.

**Fig. S6.** N<sub>2</sub> Sorption Data of DFNS Synthesized using various Alcohols

**Fig. S7.** SEM Images of Aggregated DFNS

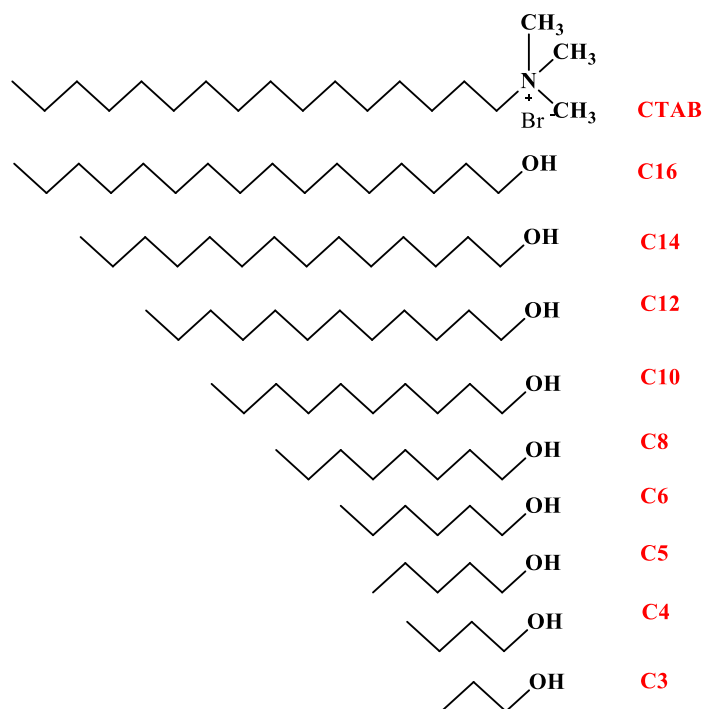

**Fig. S1.** Structural-similarity between CTAB (having C16 carbon chain) and alcohols carbon chain

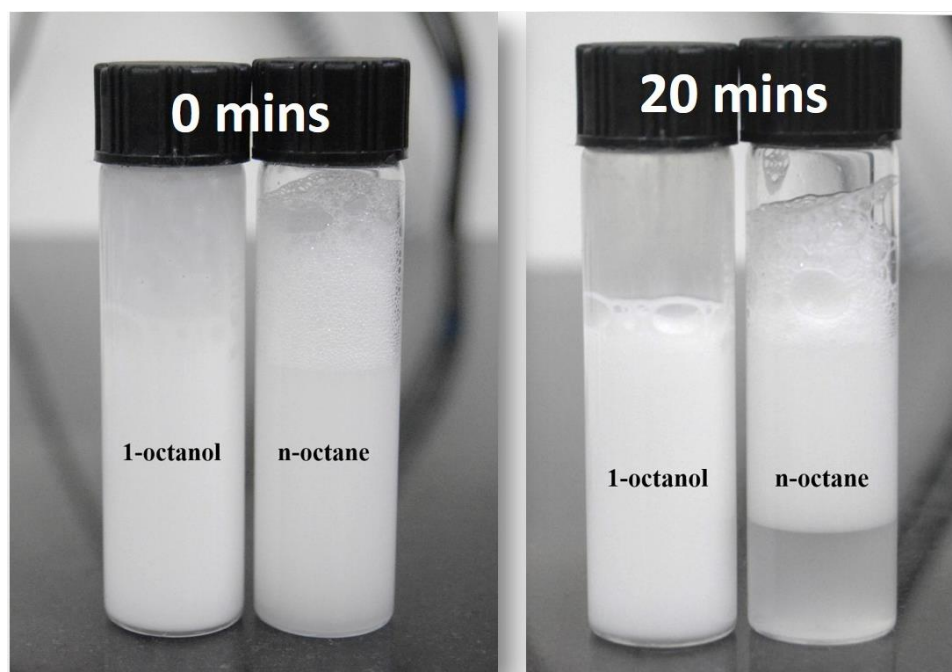

**Fig. S2.** Bulk emulsion stability using 1-octanol and n-octane as co-surfactant.

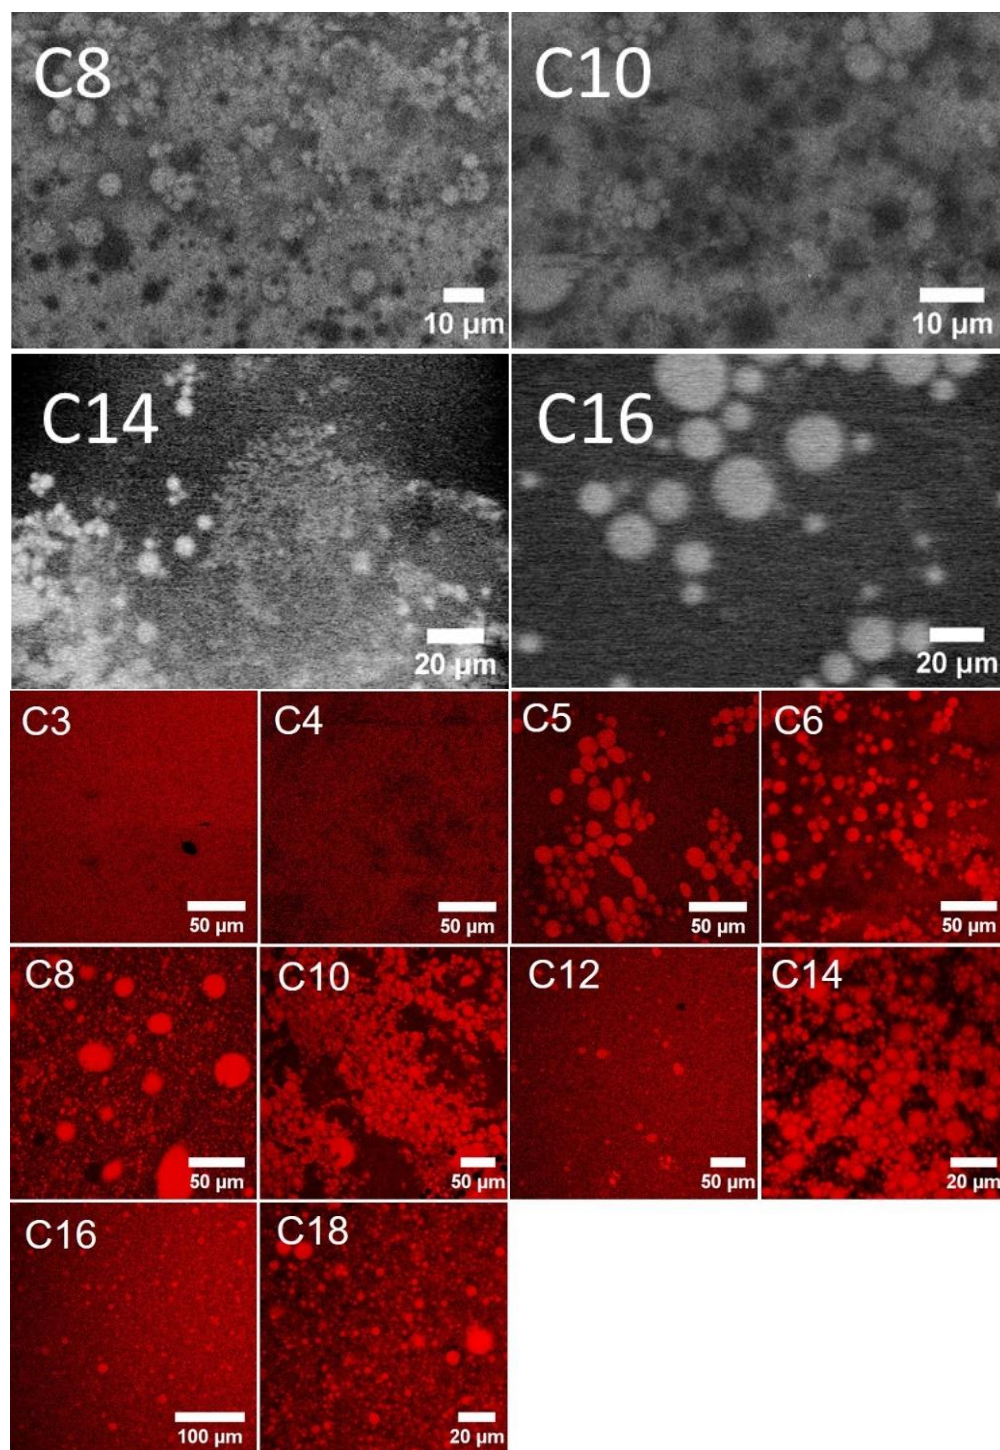

**Fig. S3.** (top) SEM (bottom) confocal images of emulsion using various alcohol as co-surfactant. For confocal imaging, Nile red dye as contrast agent and 543nm continuous-wave laser was used.

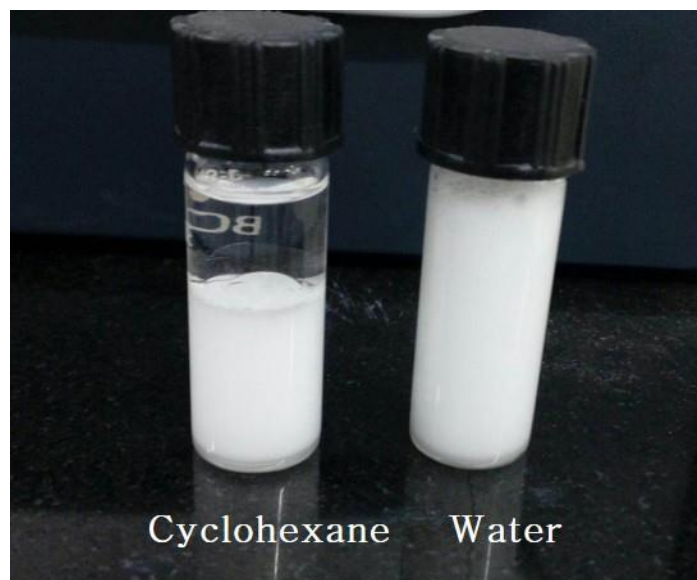

**Fig. S4.** Excess solvent addition test to know the dispersion phase of the emulsion.

**Fig. S5.** Additional SEM images of DFNS formed using various alcohols. DFNS are non-conducting materials and when their sizes are small, their imaging is out of the SEM instrument resolution limit and hence moderate quality images were obtained. For smaller DFNS, please see TEM images given figure 2

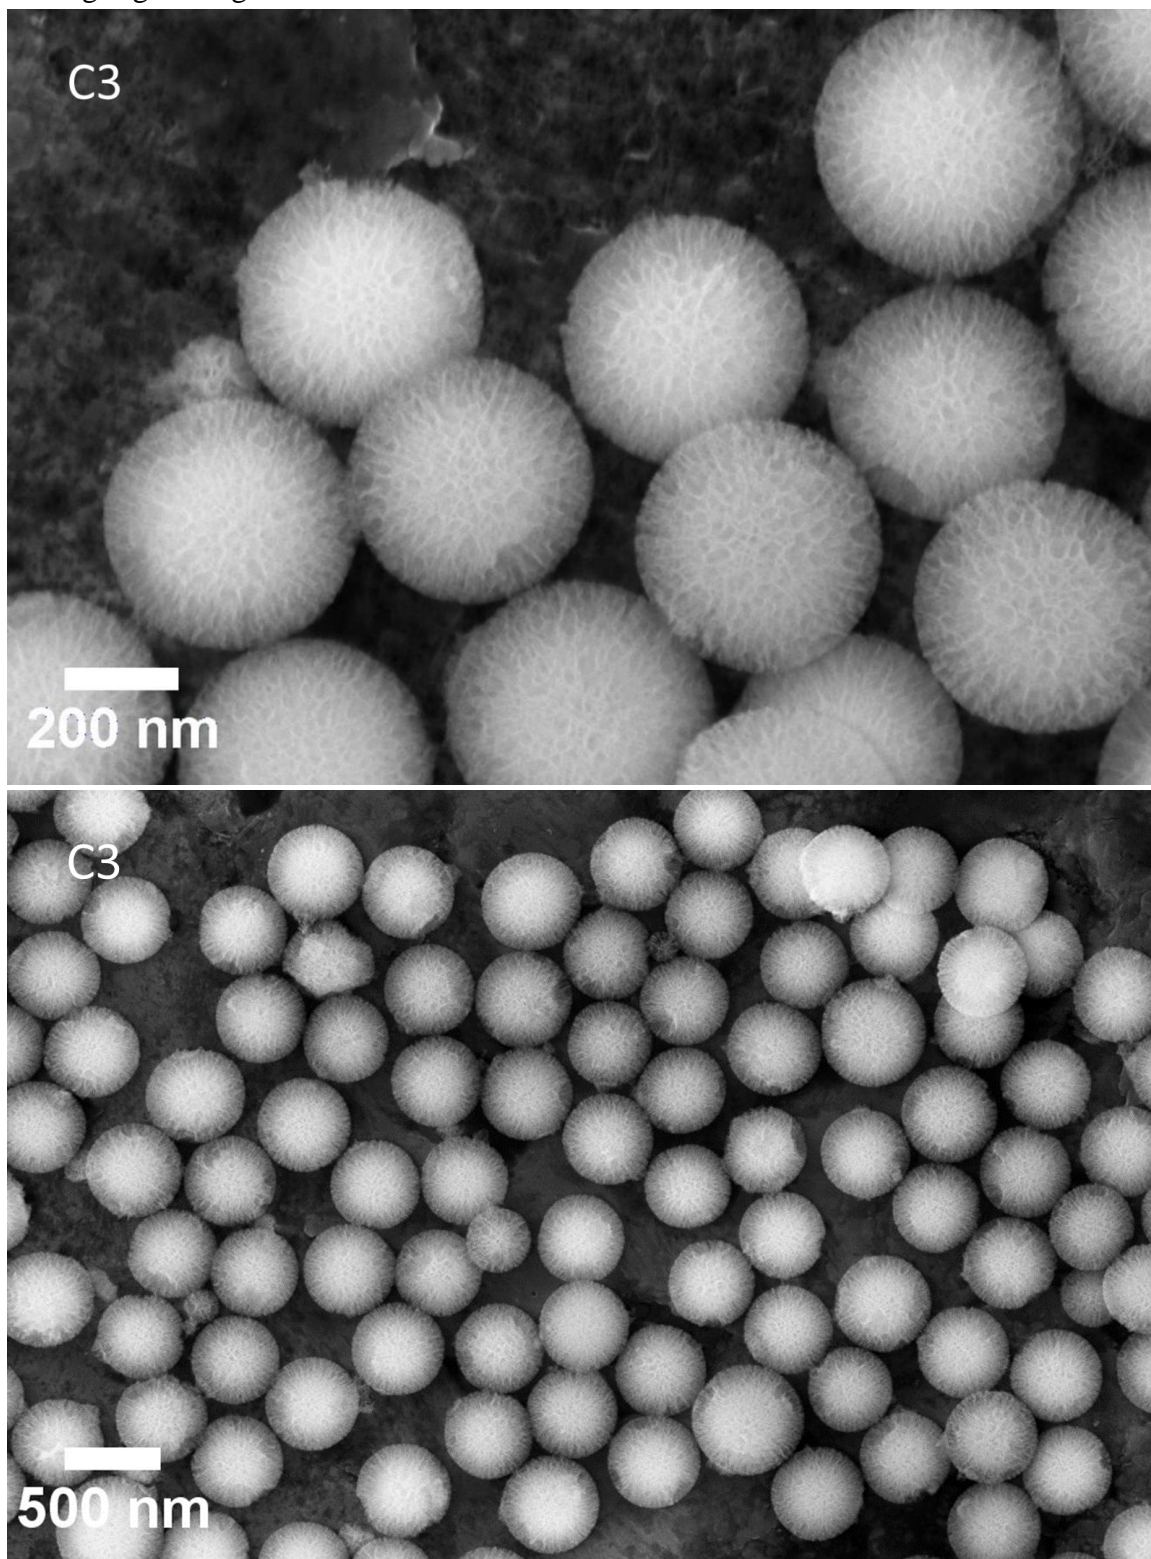

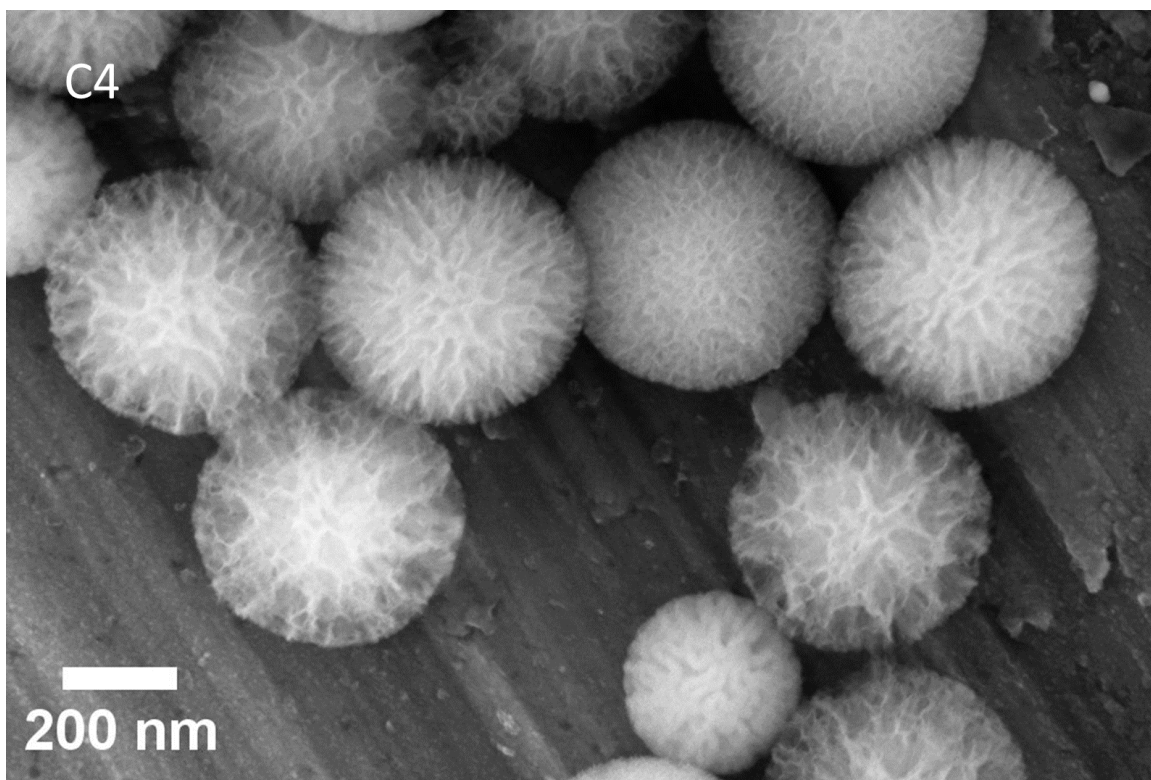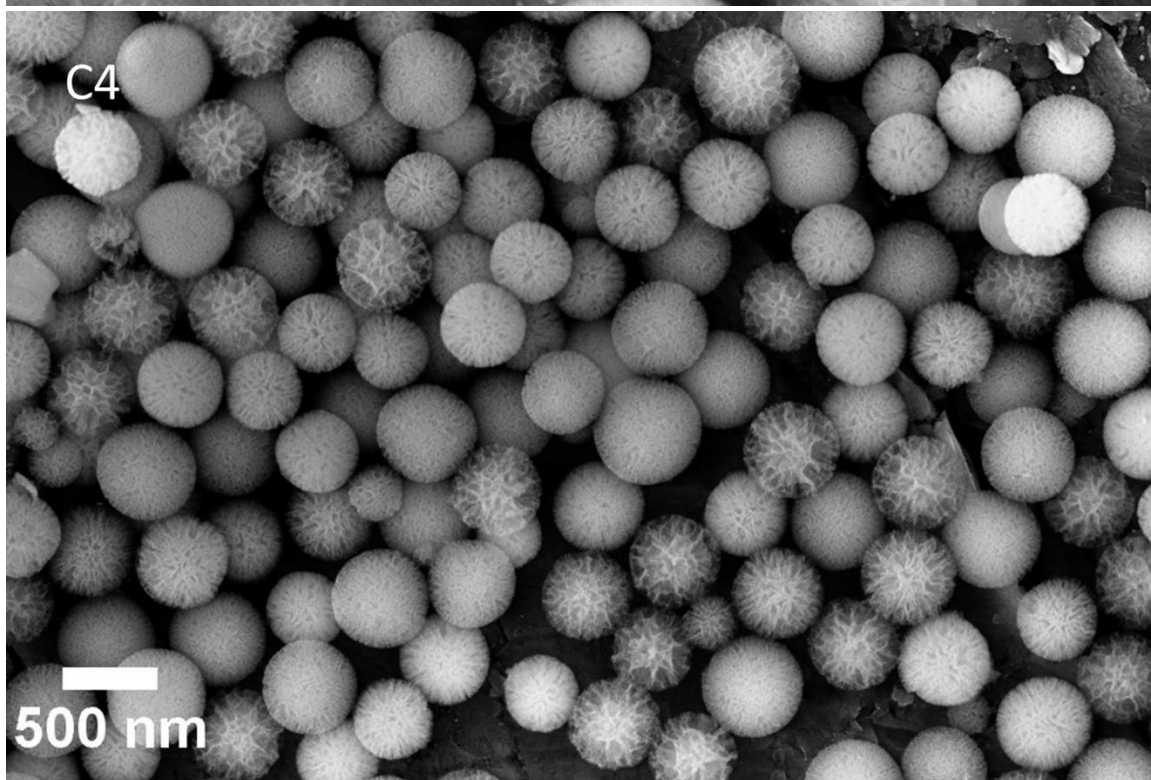

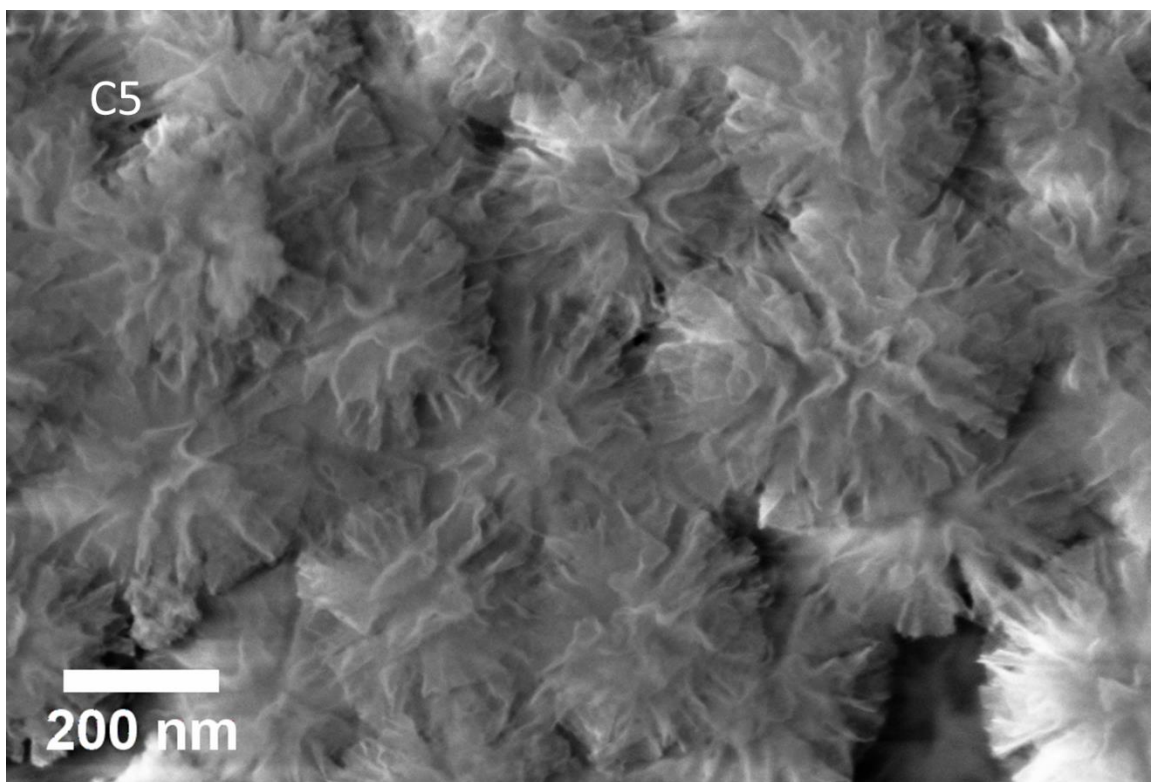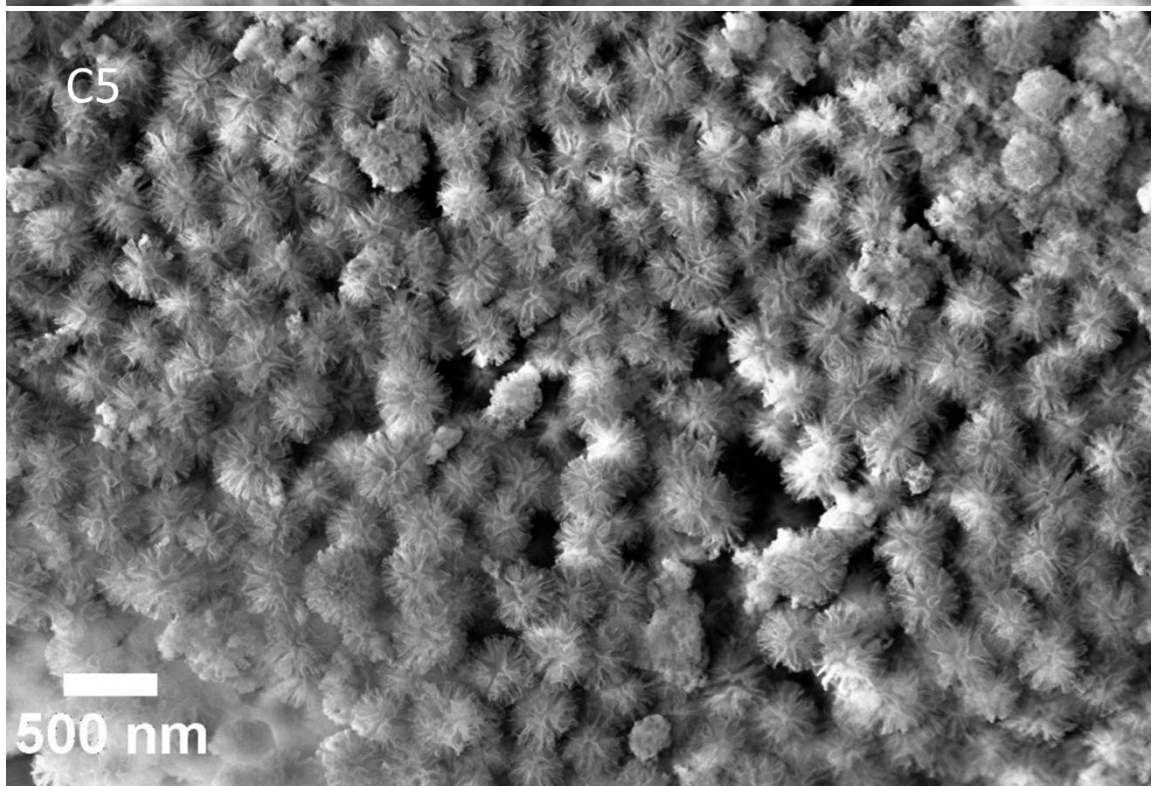

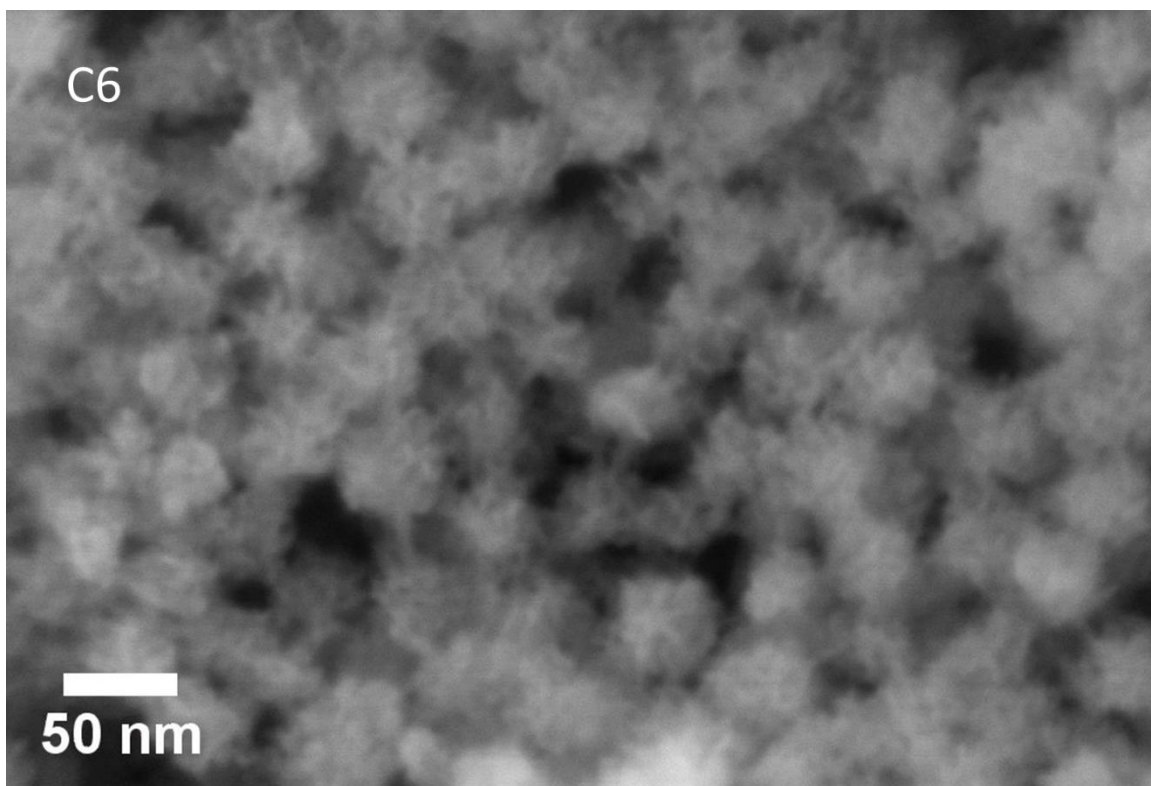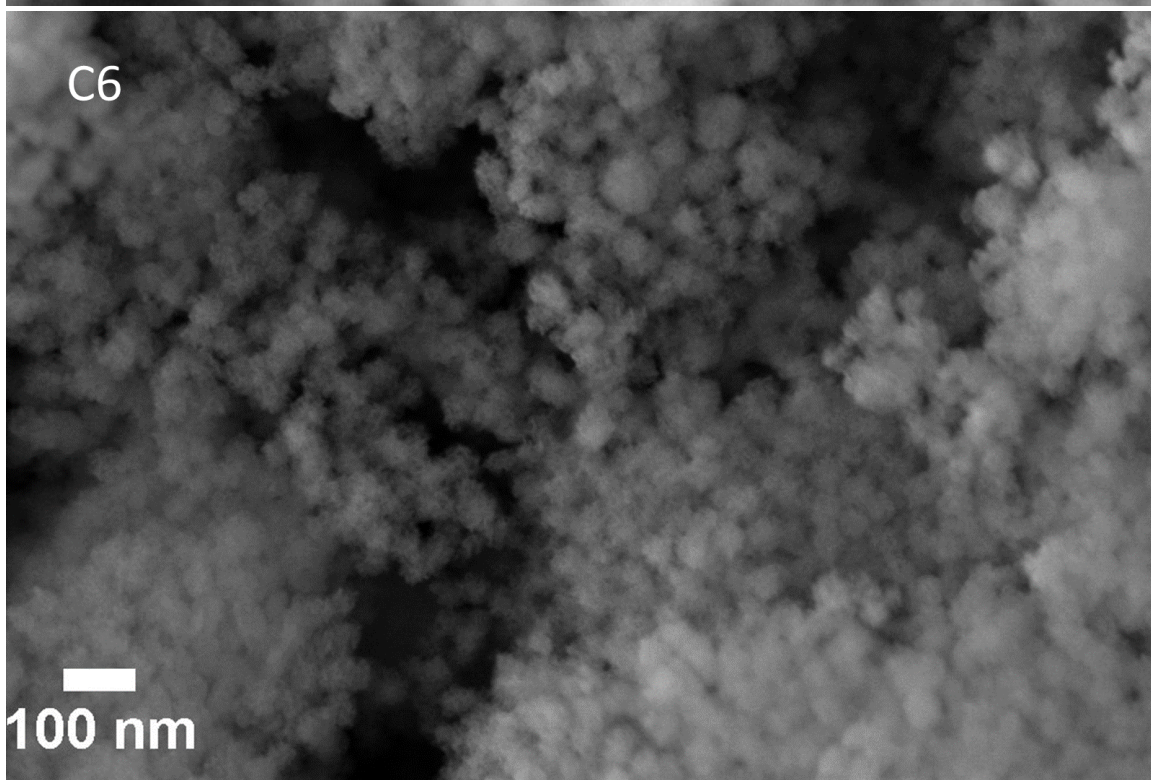

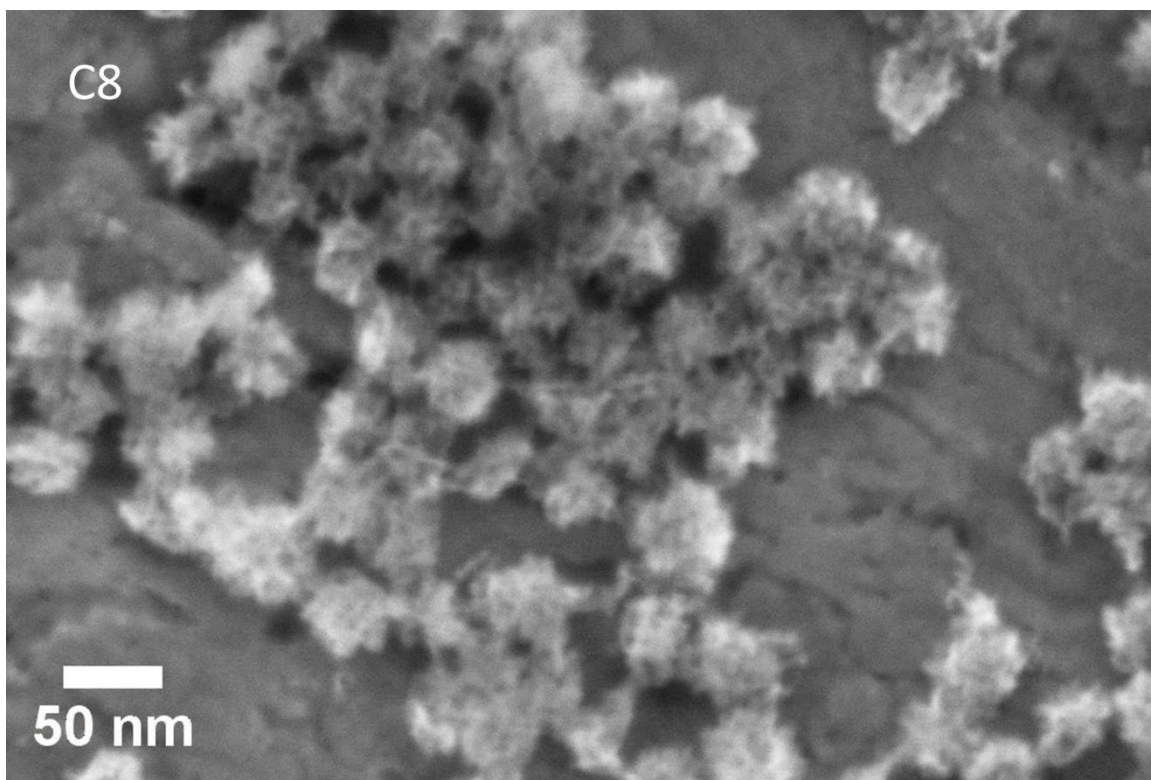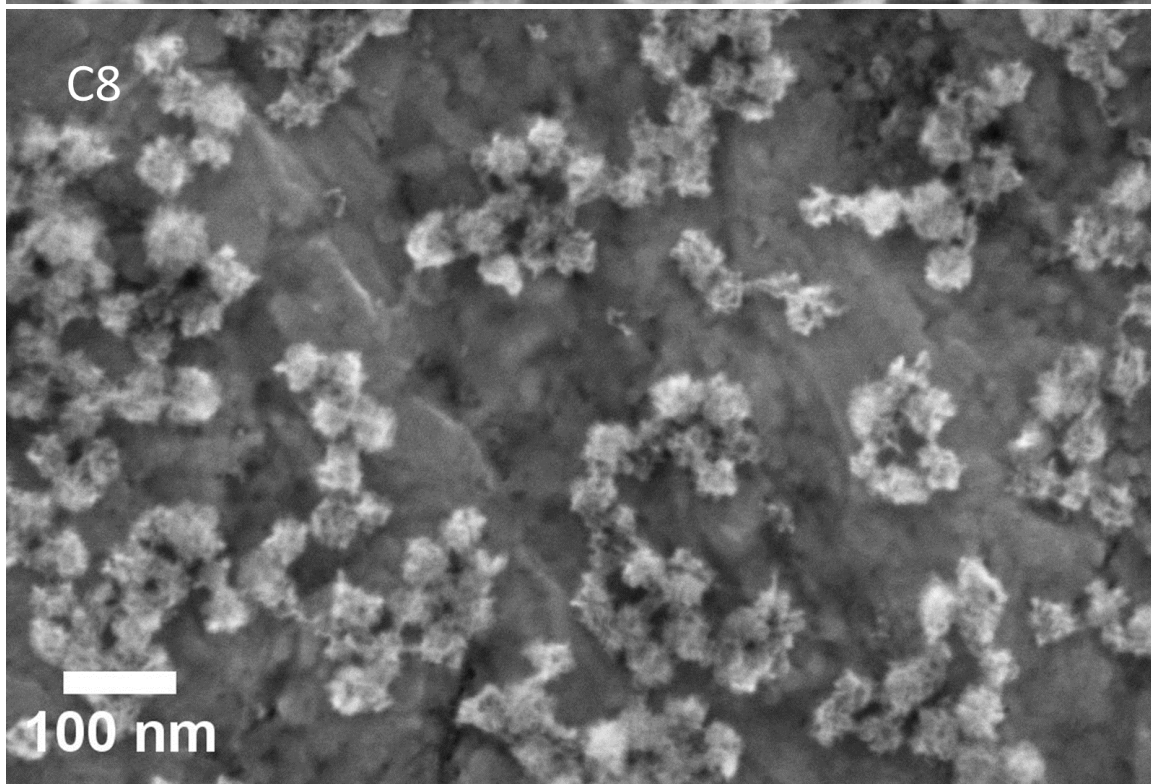

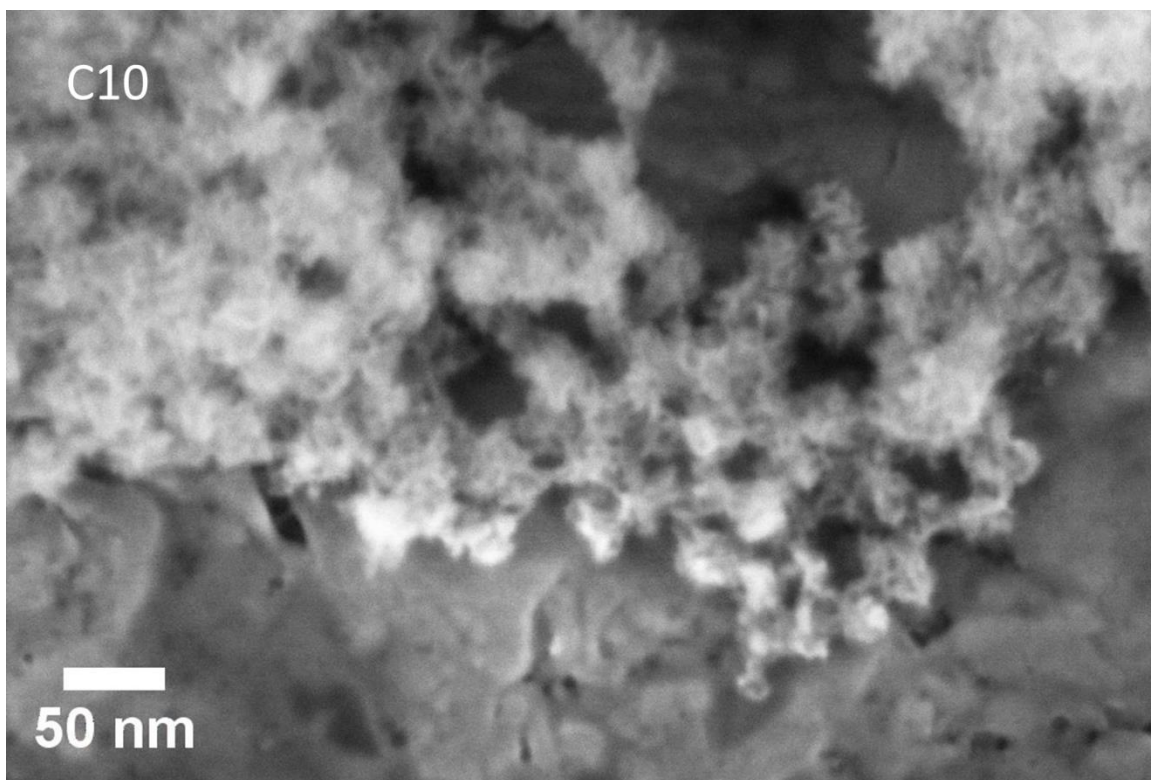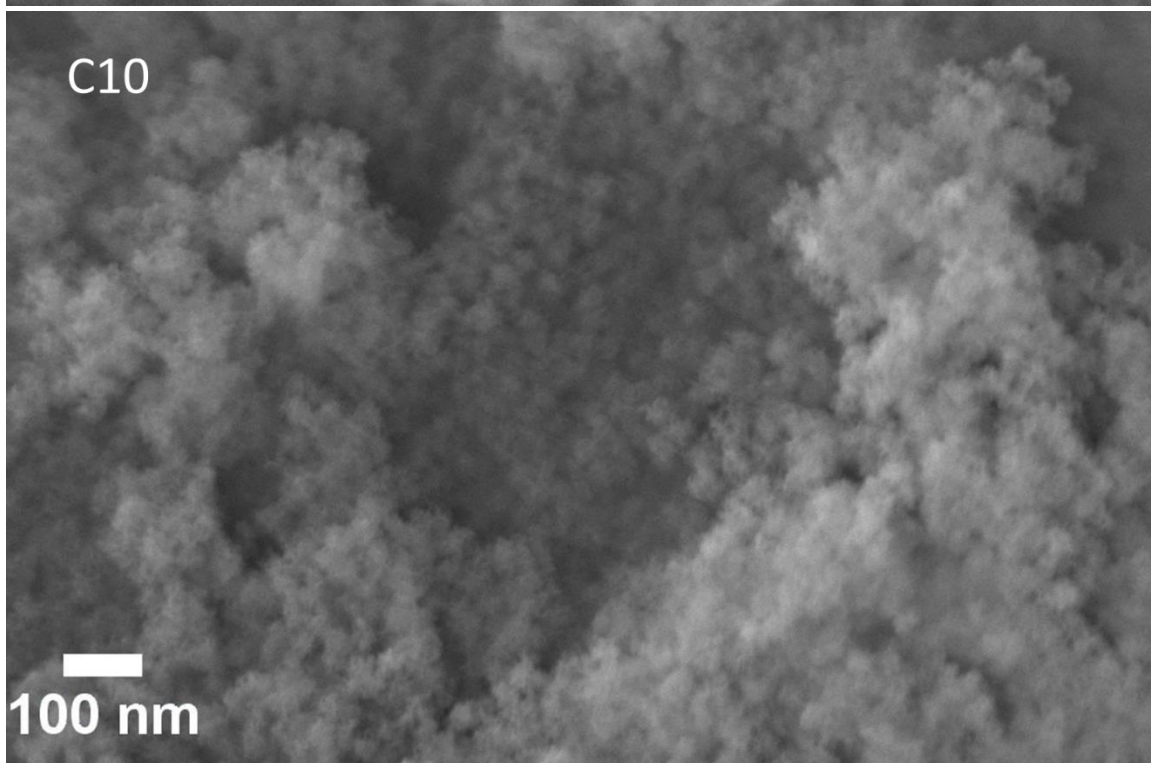

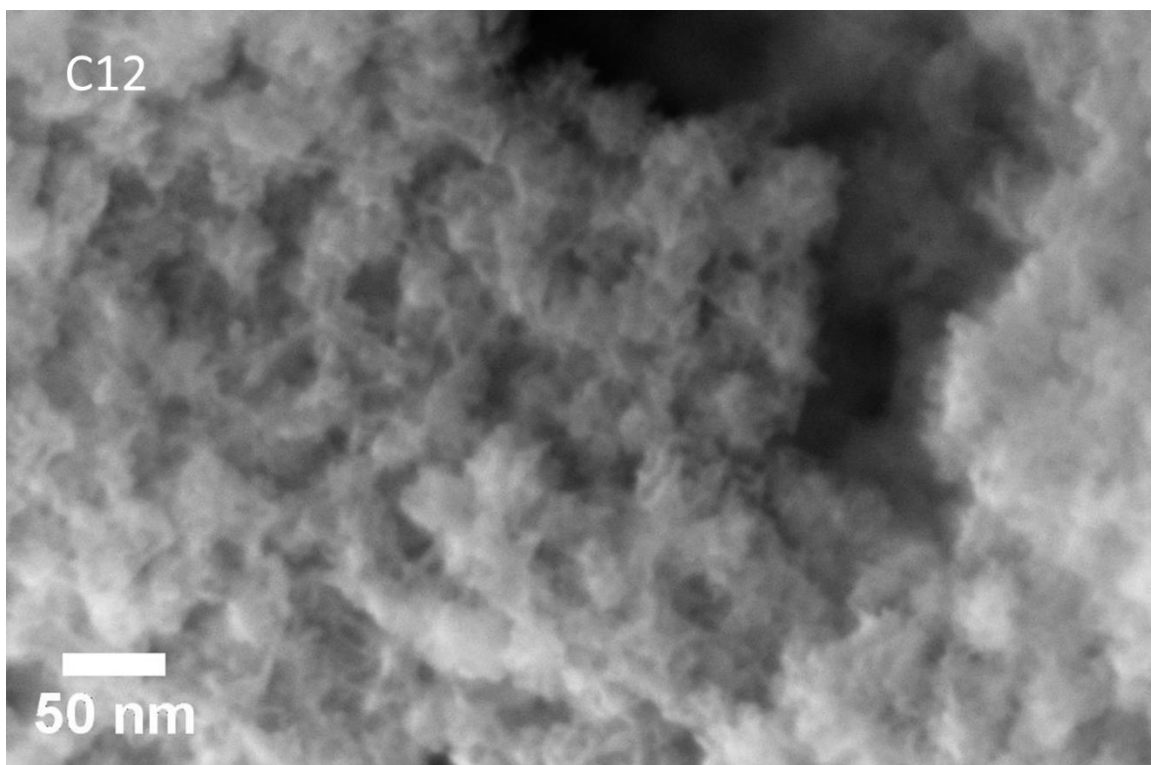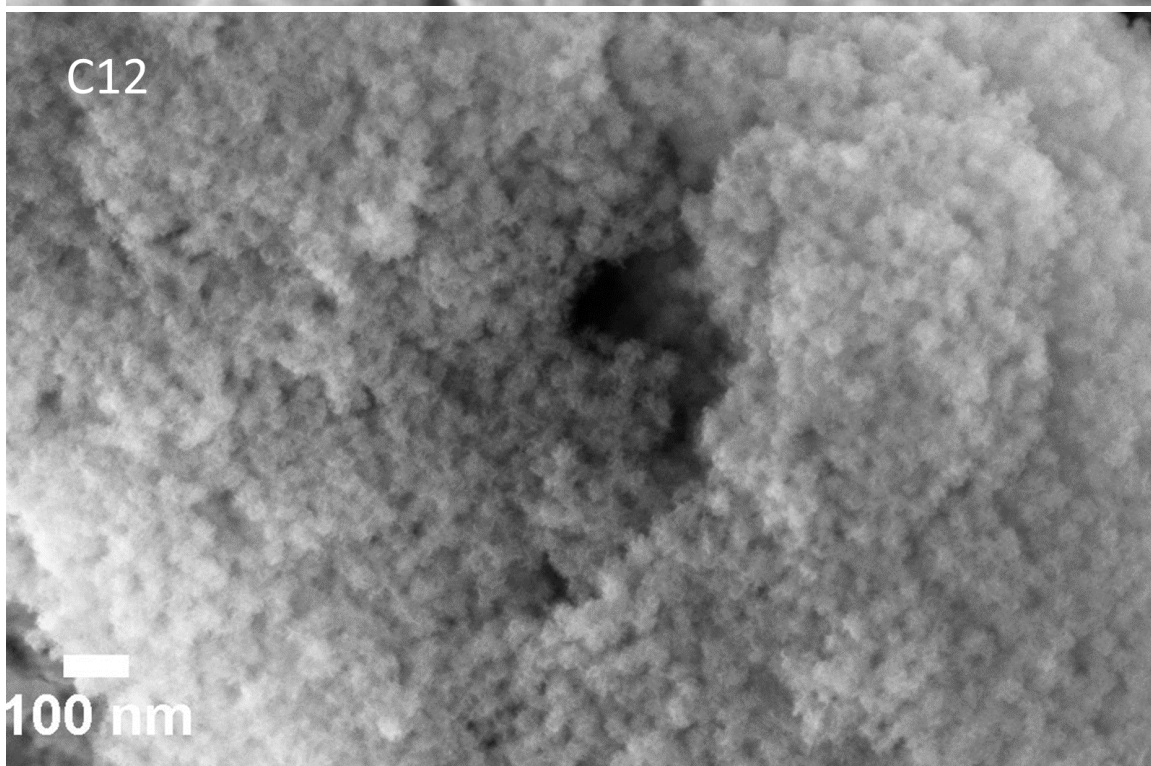

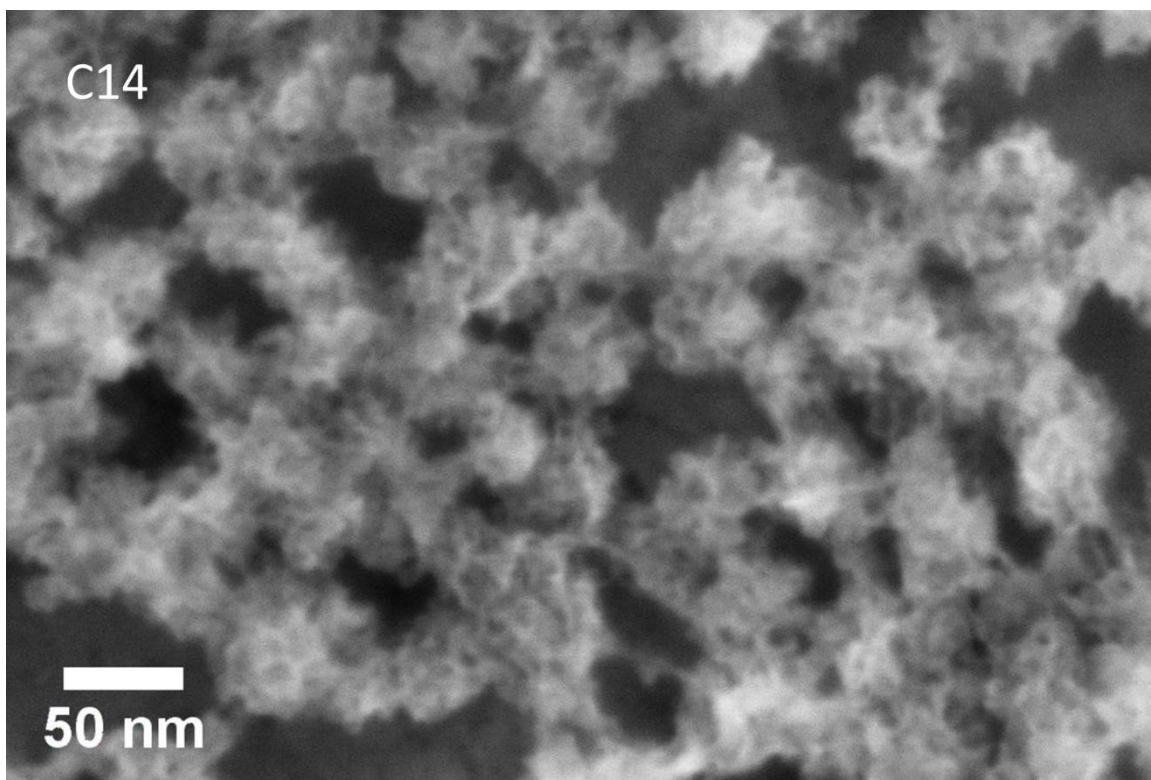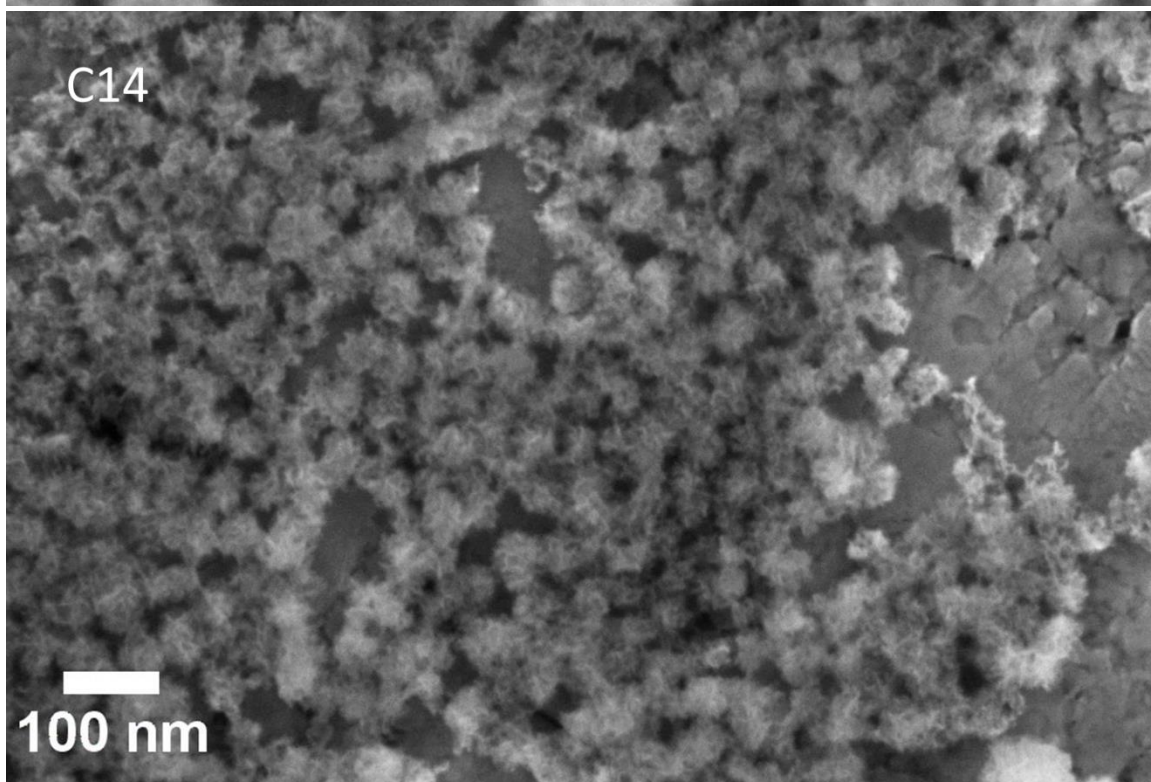

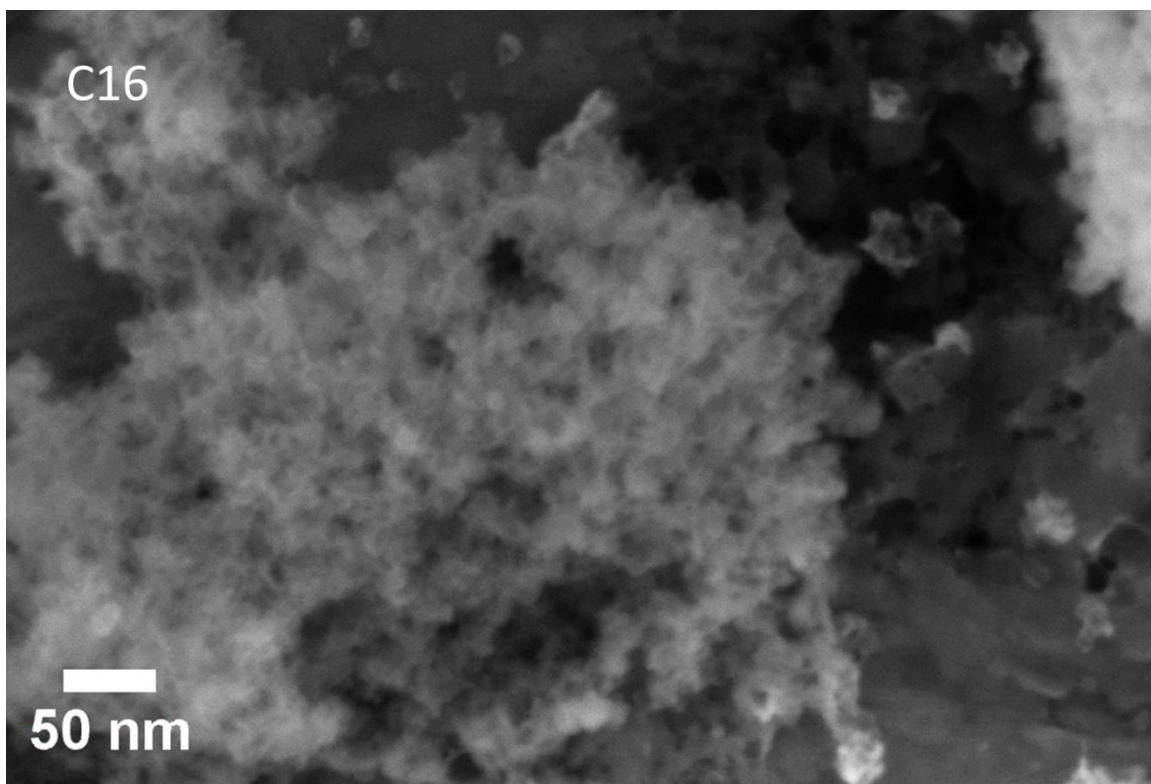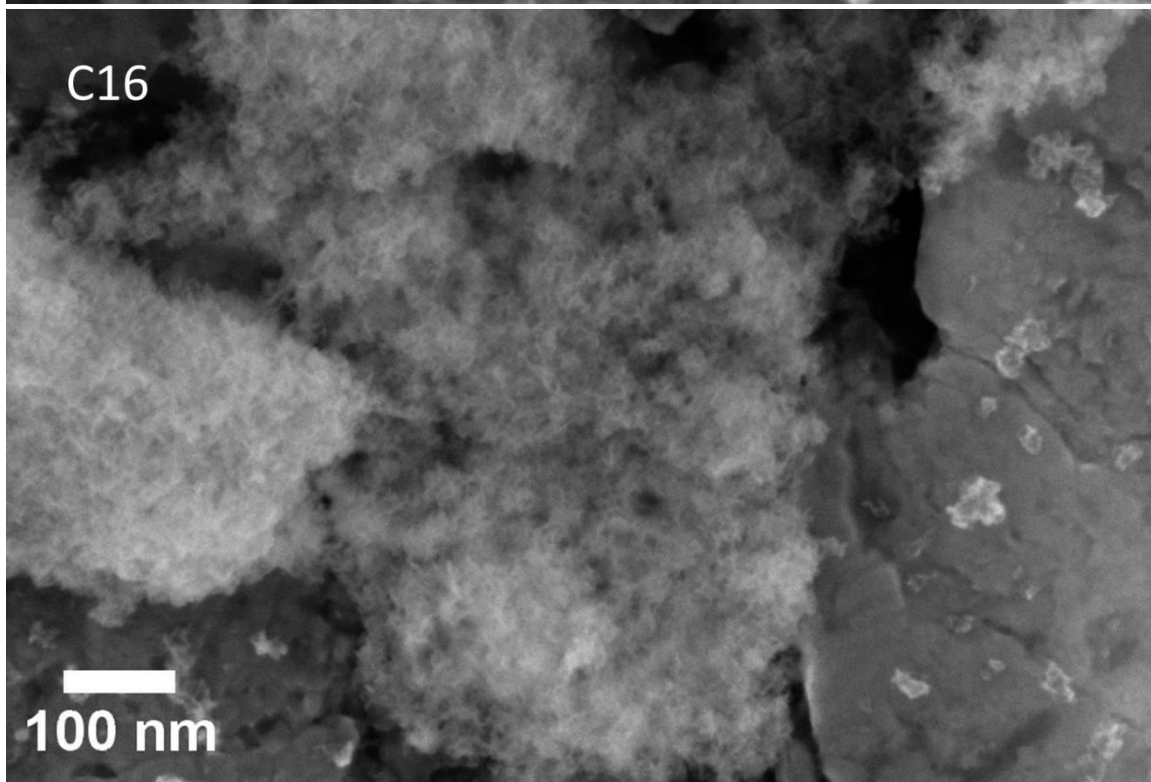

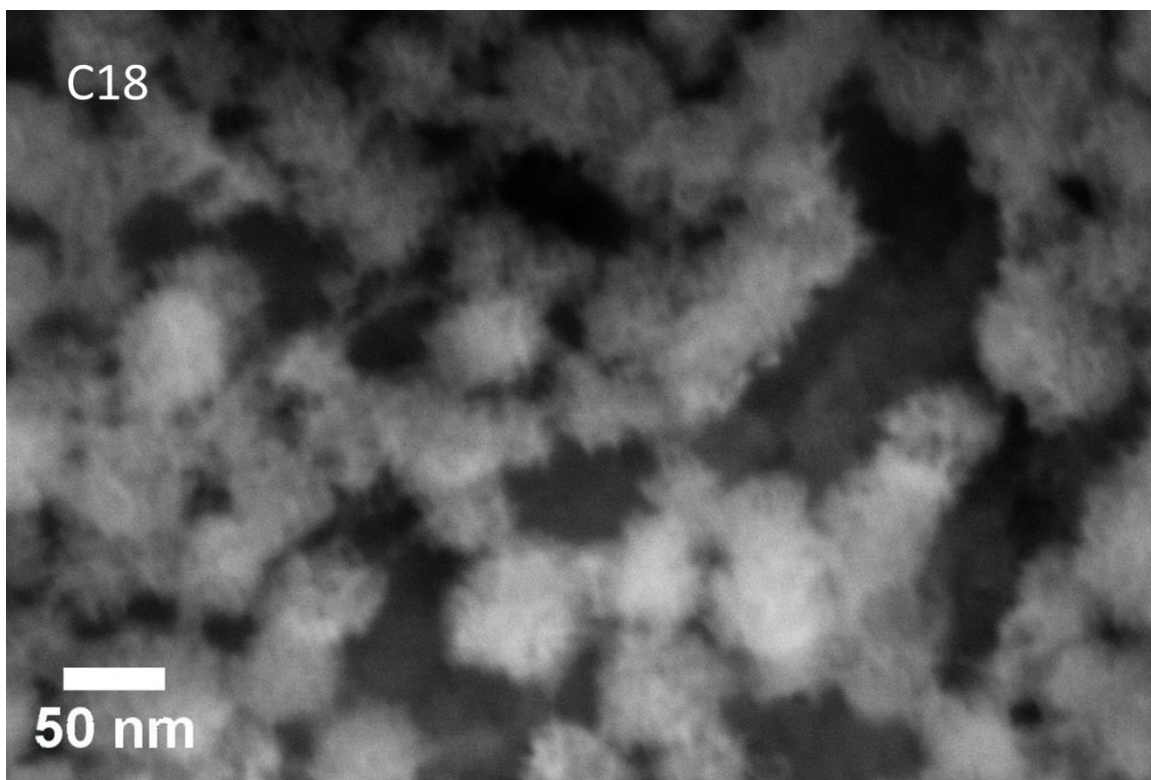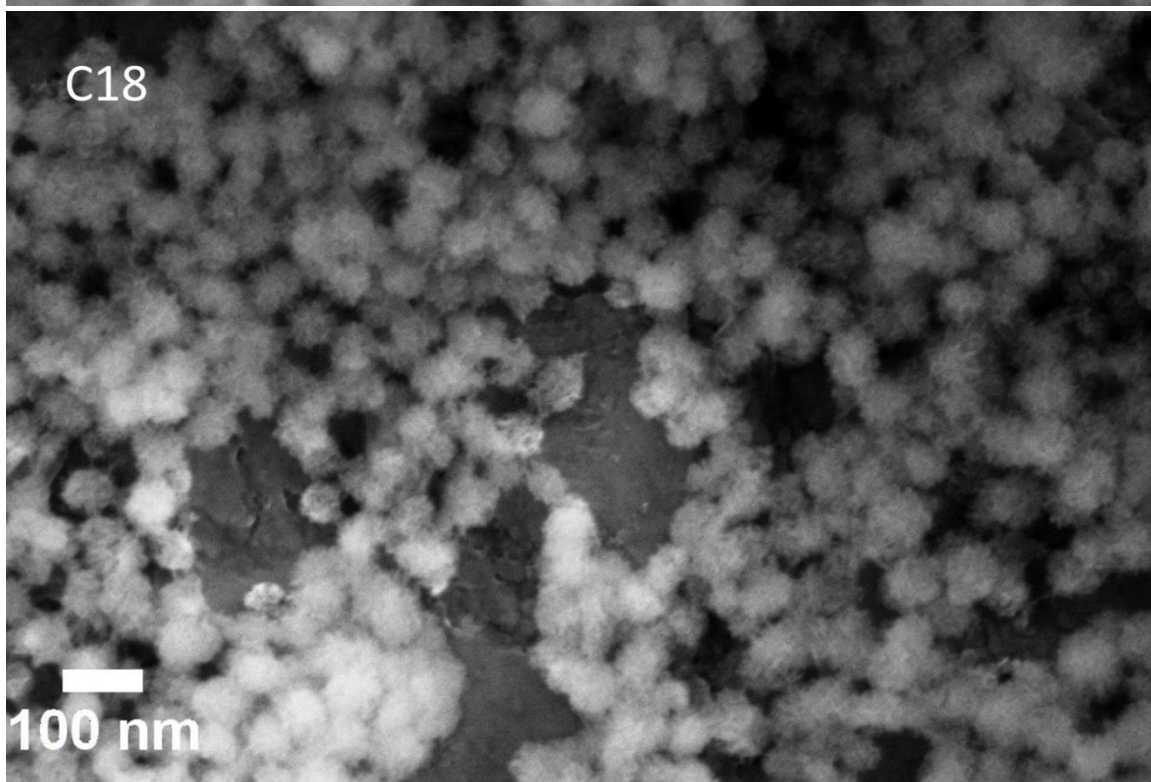

**Fig. S6.** N<sub>2</sub> Sorption Data of DFNS Synthesized using various Alcohols

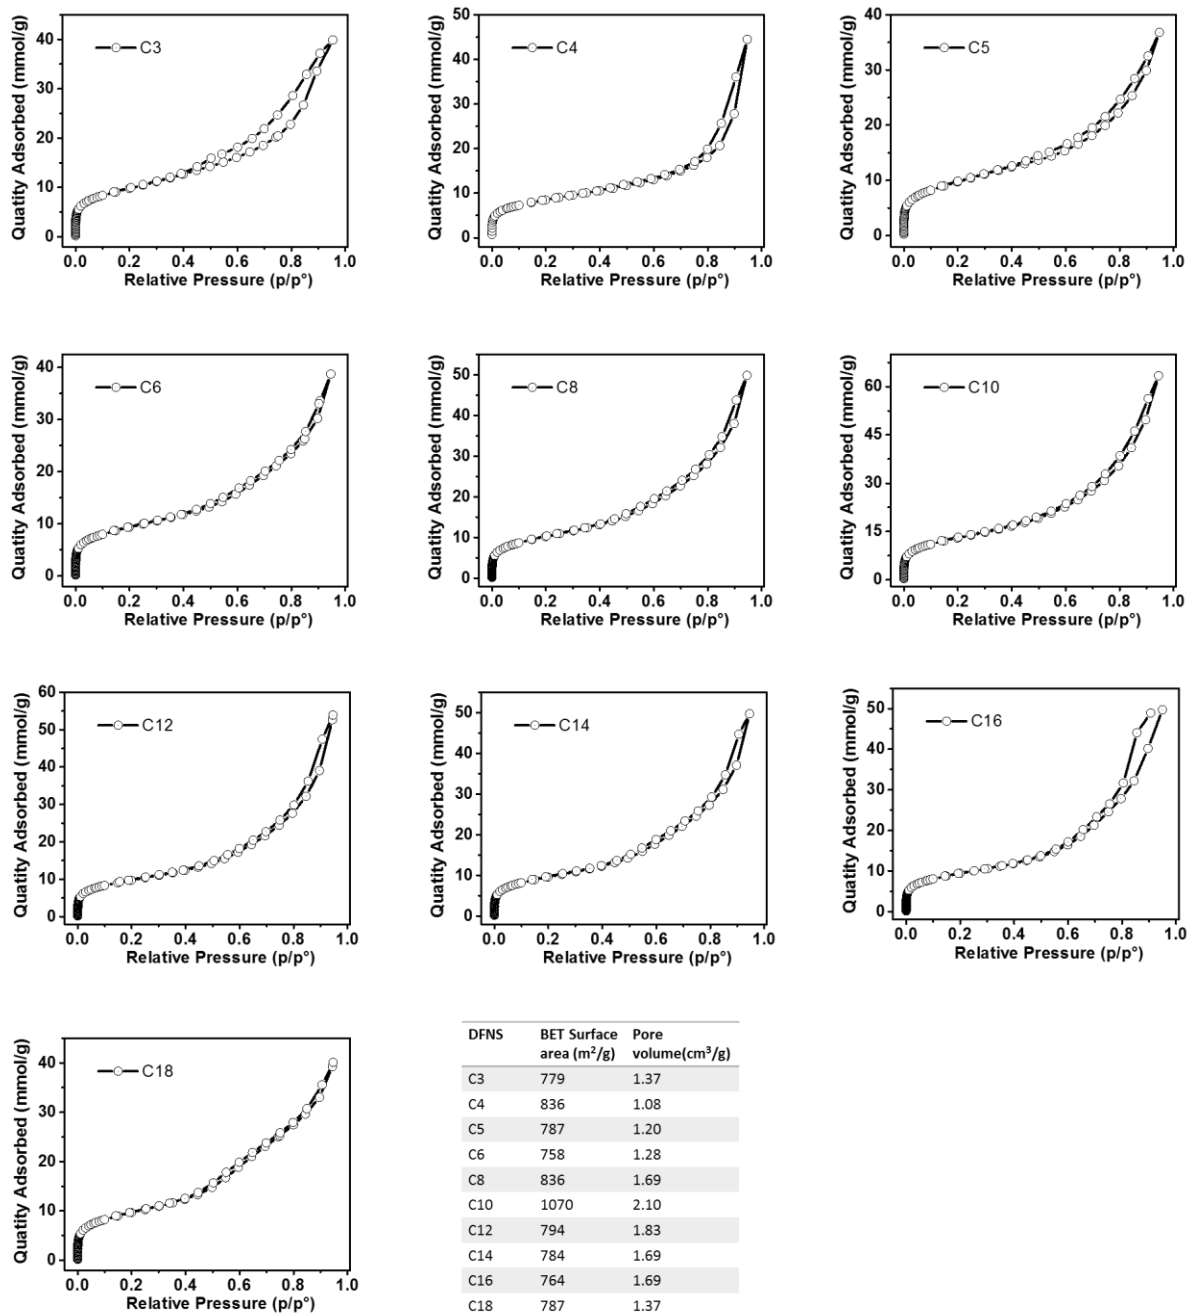

Standard error in measurements: BET surface area- 4%, Pore volume - 0.01

**Fig. S7.** SEM Images of Aggregated DFNS

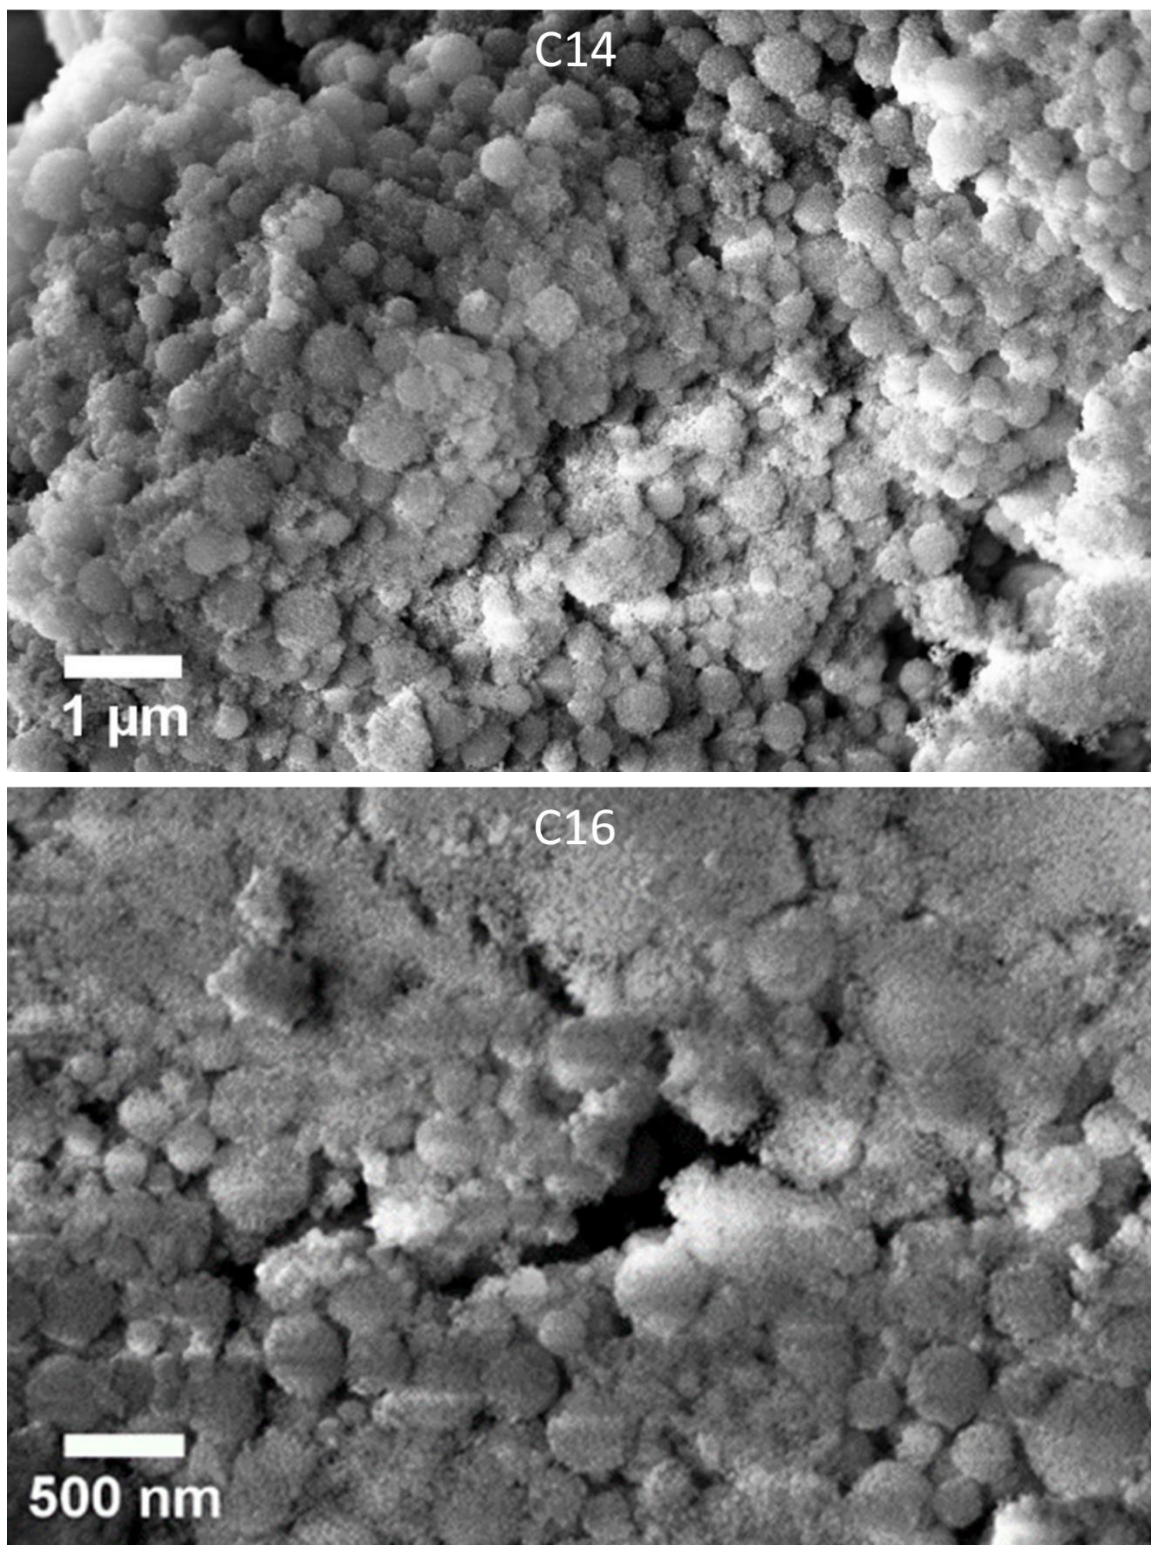

Supplement: Supplementary file 1 [file 9778813]
